# Supplementary material for: The Phytophthora sojae Effector PsAvh208 Hijacks Host Aquaporin Tetramerization to Establish a Water Soaked Infection Niche
Source: Research Square preprint supplement (doi:10.21203/rs.3.rs-8120386/v1), 2025-11-20
Supplement: Supplementary file 1 [file d1eac6559693ae55cfd38860.docx]

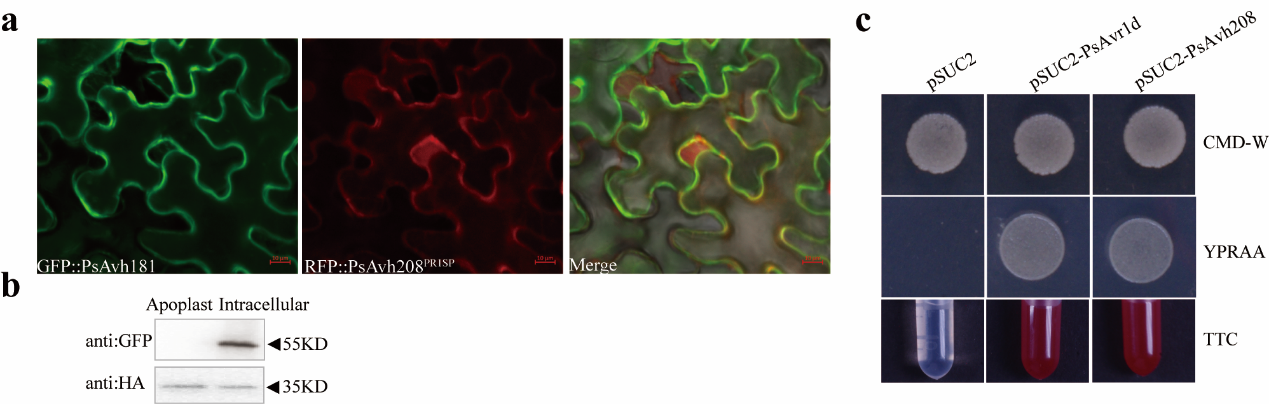


**Supplementary Fig. S1. Subcellular localization and secretion activity of PsAvh208.** **a.** Co-localization of PsAvh208 with PsAvh181 under plasmolysis conditions, showing PsAvh208 accumulation in the apoplast. **b.** Immunoblot analysis of PsAvh208 and PsAvh181 in intracellular and extracellular protein fractions, confirming secretion of PsAvh208. **c.** Yeast signal sequence trap assay showing that PsAvh208 and PsAvr1d enable yeast growth on YPRAA medium by reducing 2,3,5-triphenyltetrazolium chloride (TTC) to triphenyl formazan (TPF), indicating functional signal peptides.


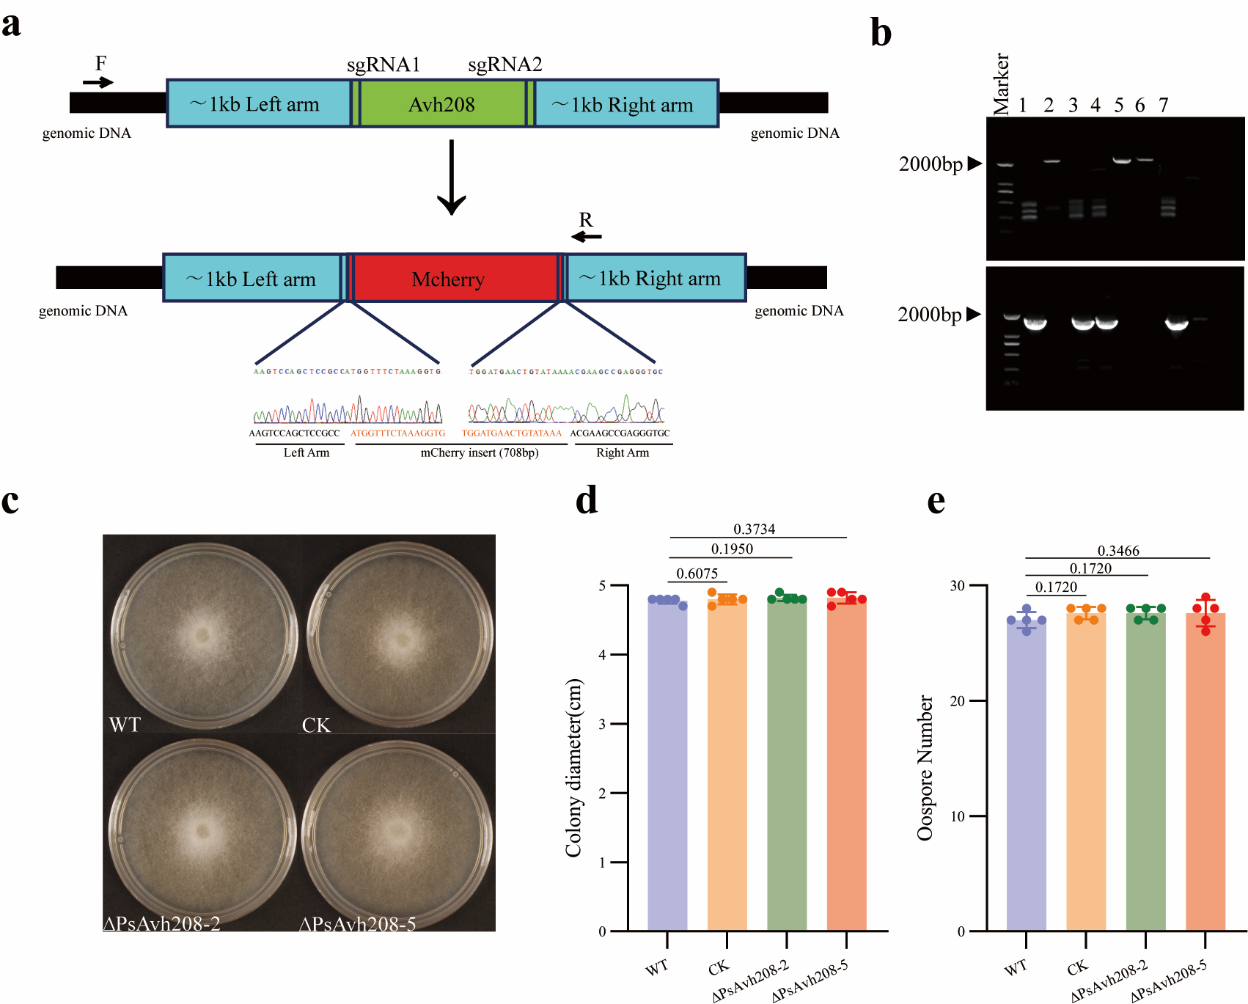


**Supplementary Fig. S2 Generation and phenotypic characterization of *PsAvh208* knockout mutants. a.** Schematic diagram of PsAvh208 gene knockout using the CRISPR/Cas9 system. Knockout mutants were verified by PCR using primers F and R. **b.** PCR validation of PsAvh208 knockout transformants. **c.** Comparison of mycelial growth rates among PsAvh208 knockout mutants, wild-type, and control strains. Images were taken after 5 days of growth on V8 medium.
**d.** Measurement of mycelial colony diameter on V8 medium. **e.** Quantification of oospore production induced by *P. sojae*. Data in **d** and **e** are presented as mean ± standard deviation (s.d.). P values were calculated using a two-tailed unpaired Student’s *t*-test. Three independent biological experiments produced similar results.


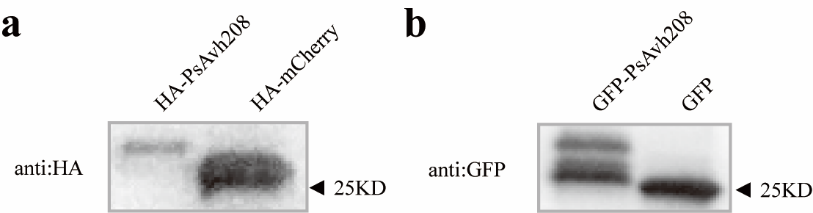


**Supplementary Fig. S3 Verification of PsAvh208 protein expression in plants. a.** Western blot analysis of RFP (EV) and RFP–PsAvh208 expression in transgenic soybean hairy roots. **b.** Western blot analysis of GFP and GFP–PsAvh208 expression in *N. benthamiana* leaves.


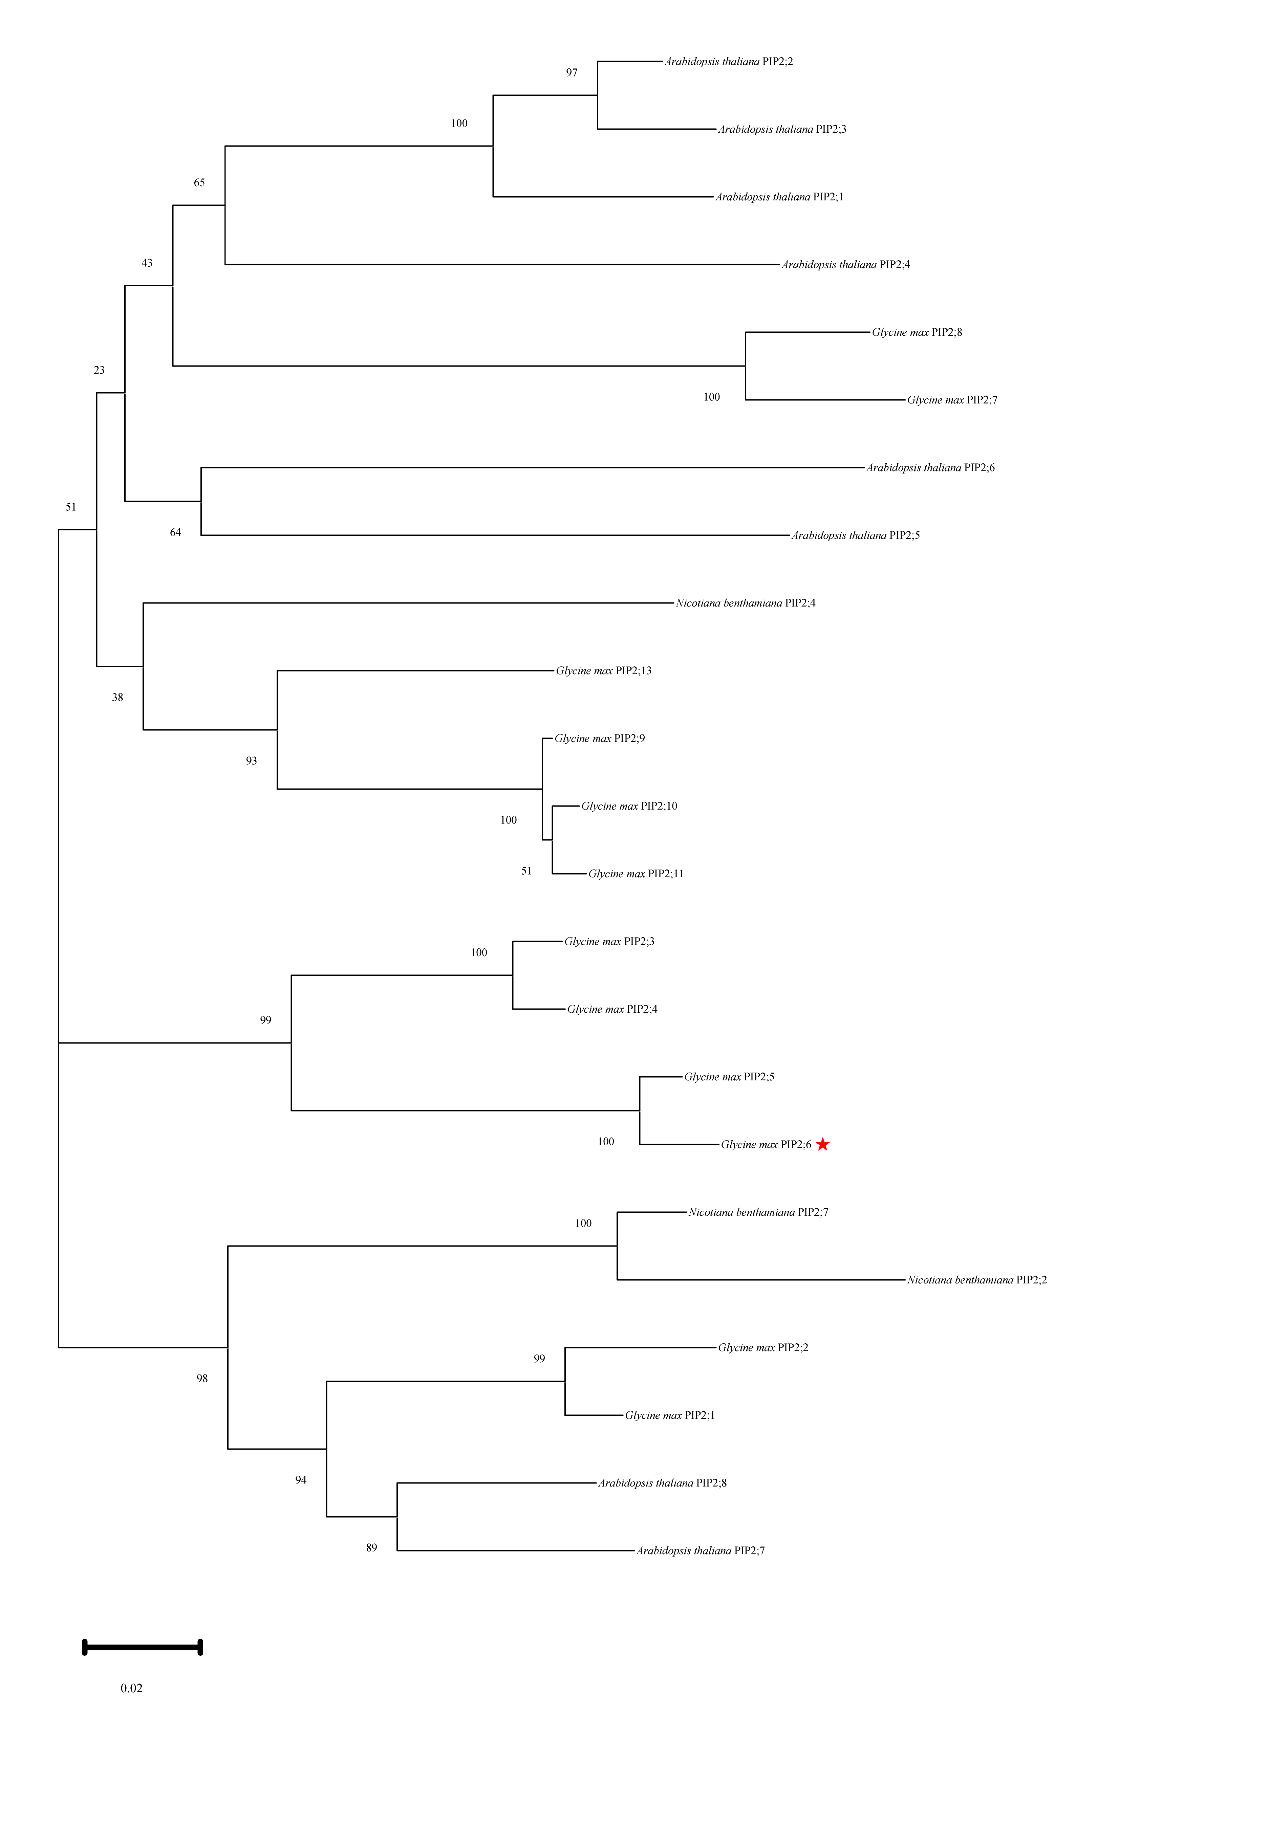


**Supplementary Fig. S4 Phylogenetic analysis of PIP2 homologs in *Arabidopsis thaliana*, *Nicotiana benthamiana*, and *Glycine max*.** A maximum-likelihood phylogeny was constructed from full-length protein sequences, revealing the evolutionary relationship of GmPIP2;6 with its homologs in *A. thaliana* and *N. benthamiana*.


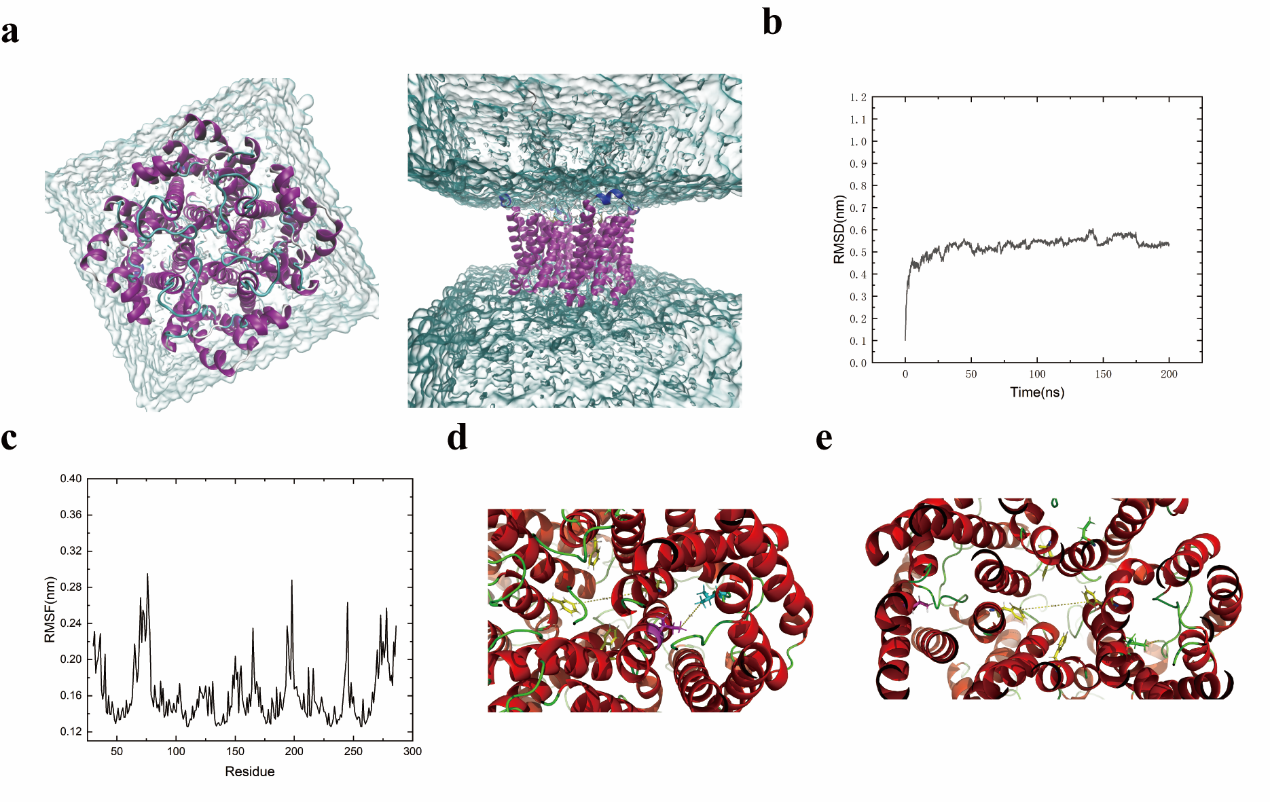


**Supplementary Fig. S5 Molecular dynamics simulation of the GmPIP2;6 tetramer.** **a.** Construction of the tetrameric protein–lipid bilayer system. A POPE bilayer (120 Å × 120 Å) was built using the Bilayer Builder module, with the tetrameric GmPIP2;6 protein embedded at the center and a 0.4 mmol/L K⁺/Cl⁻ ionic concentration added. **b.** Root mean square deviation (RMSD) of the channel protein over the course of the simulation. **c.** Average root mean square fluctuation (RMSF) values for residues within the tetrameric channel protein. **d.** Definition of the interface based on the geometric midpoint between the terminal carbon atoms of the Ile93 and Val112 side chains. **e.** Definition of the interface based on the geometric midpoint between the aromatic carbon atoms of the Phe212 side chains from two adjacent monomers.


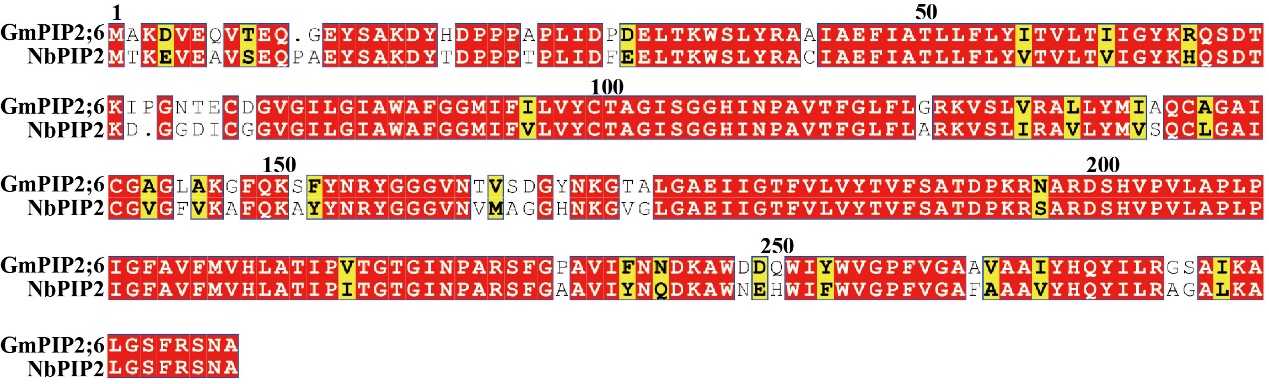


**Supplementary Fig. S6 Sequence alignment of GmPIP2;6 and its homologs in *N. benthamiana*.** Sequence alignment showing the high similarity between soybean GmPIP2;6 and its homologous aquaporin sequences in *N. benthamiana*. Conserved residues are indicated, highlighting structural and functional conservation across species.


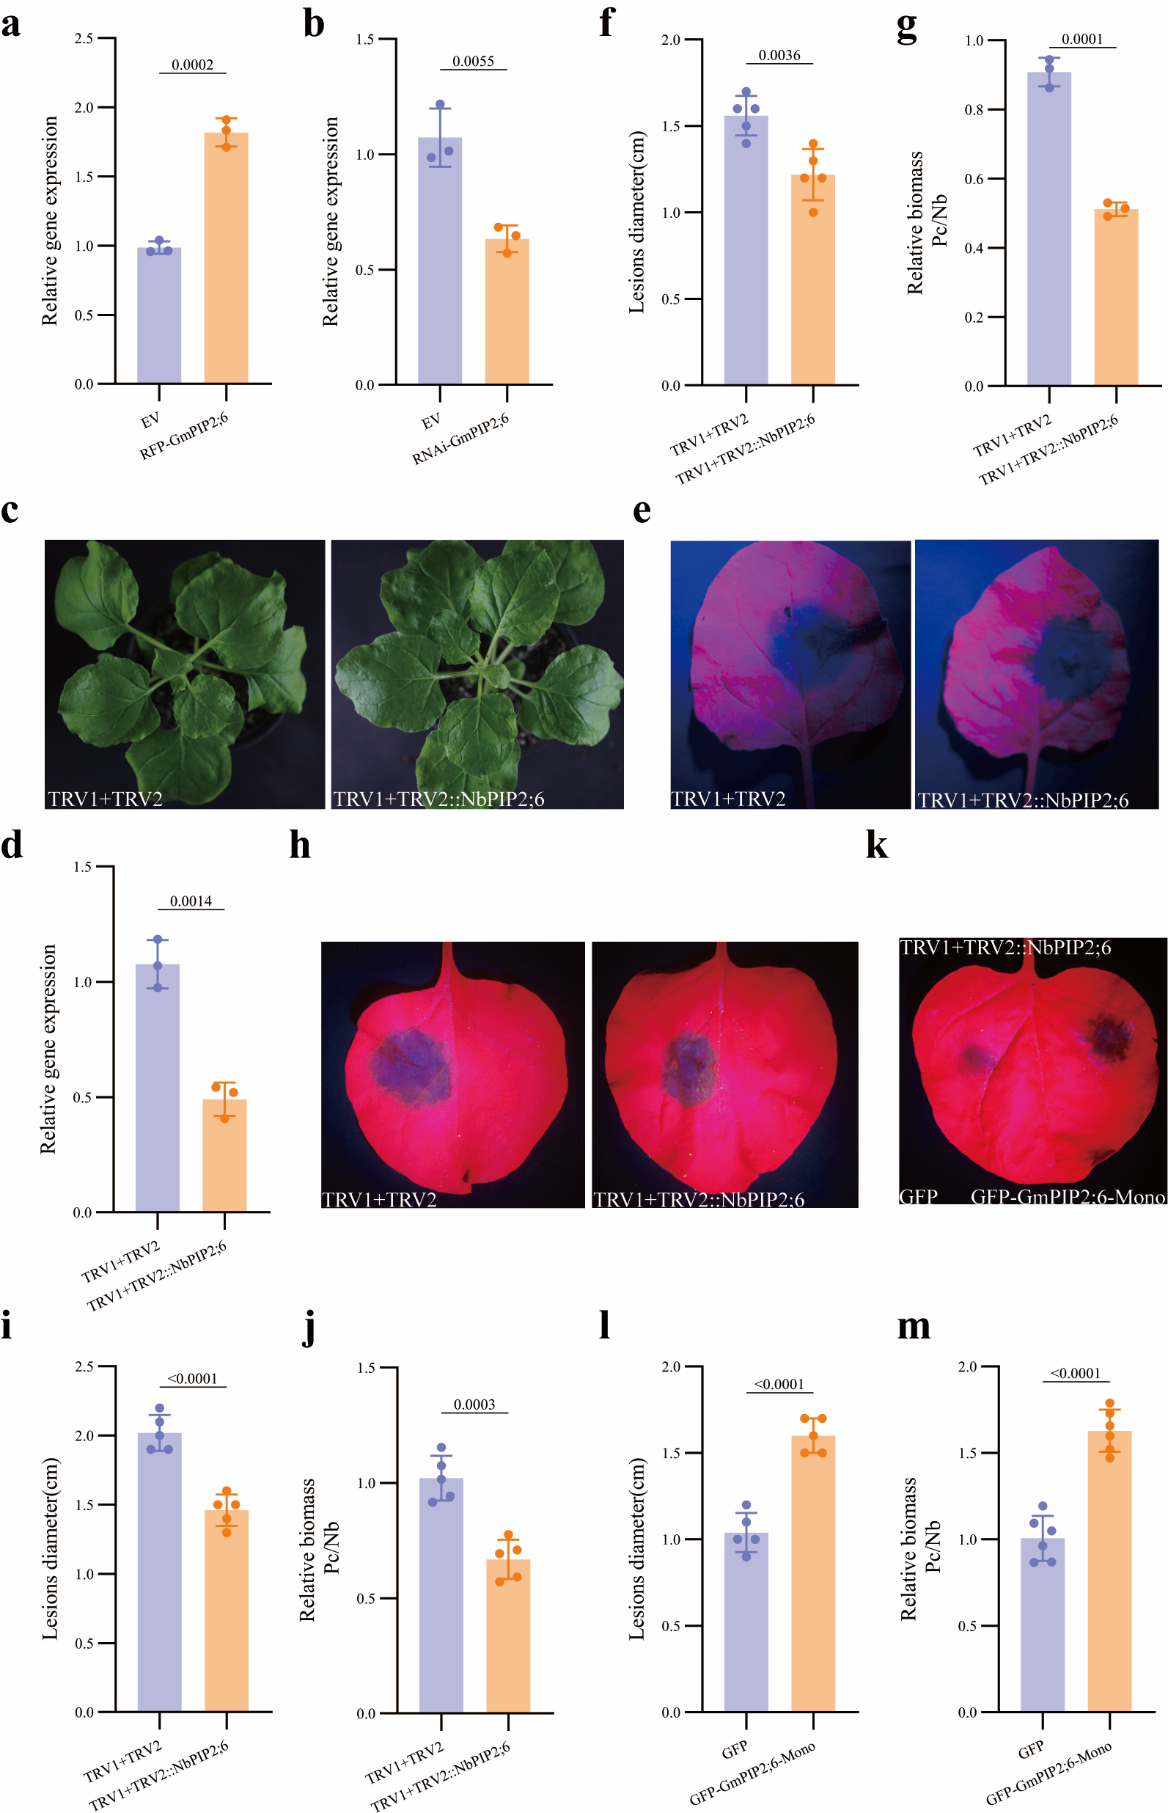


**Supplementary Fig. S7 Functional analysis of GmPIP2;6 and its homolog NbPIP2;6 in regulating susceptibility to infection. a.b.** Quantitative RT–PCR analysis of *GmPIP2;6* expression in soybean hairy roots expressing RFP (EV), RFP–GmPIP2;6, or RFP–GmPIP2;6–RNAi. **c.** Phenotypic observation of *Nicotiana benthamiana* plants after silencing the *GmPIP2;6* homolog (*NbPIP2;6*). **d.** Quantitative RT–PCR analysis of *NbPIP2;6* expression levels in control and *NbPIP2;6*-silenced *N. benthamiana* leaves. **e.** Infection assay of *Phytophthora capsici* on *NbPIP2;6*-silenced leaves, photographed under UV light at 36 h post-inoculation. **f.** Statistical analysis of lesion diameter caused by *P. capsici*. **g.** Quantitative measurement of *P. capsici* biomass in infected leaves by qPCR. **h.** Representative UV images showing water-soaked lesions on *NbPIP2;6*-silenced and GFP control *N. benthamiana* leaves at 36 h post-inoculation under high humidity. **i.** Quantification of water-soaked lesion length under high-humidity infection conditions. **j.** Quantitative analysis of *P. capsici* biomass in leaves under high-humidity infection conditions. **k.** Infection assay of *P. capsici* on *NbPIP2;6*-silenced *N. benthamiana* leaves transiently expressing GFP or GFP–GmPIP2;6–Mono, imaged under UV light after water soaking. **l.** Statistical analysis of lesion diameter following *P. capsici* infection in GFP- or GFP–GmPIP2;6–Mono–expressing leaves. **m.** Quantitative analysis of *P. capsici* biomass in GFP- or GFP–GmPIP2;6–Mono–expressing leaves after infection.Data in (**a, b, d, f, g, i, j, l, m**) are presented as means ± standard deviation (s.d.). P values were calculated using a two-tailed unpaired Student’s *t*-test. All experiments were repeated three times with similar results.


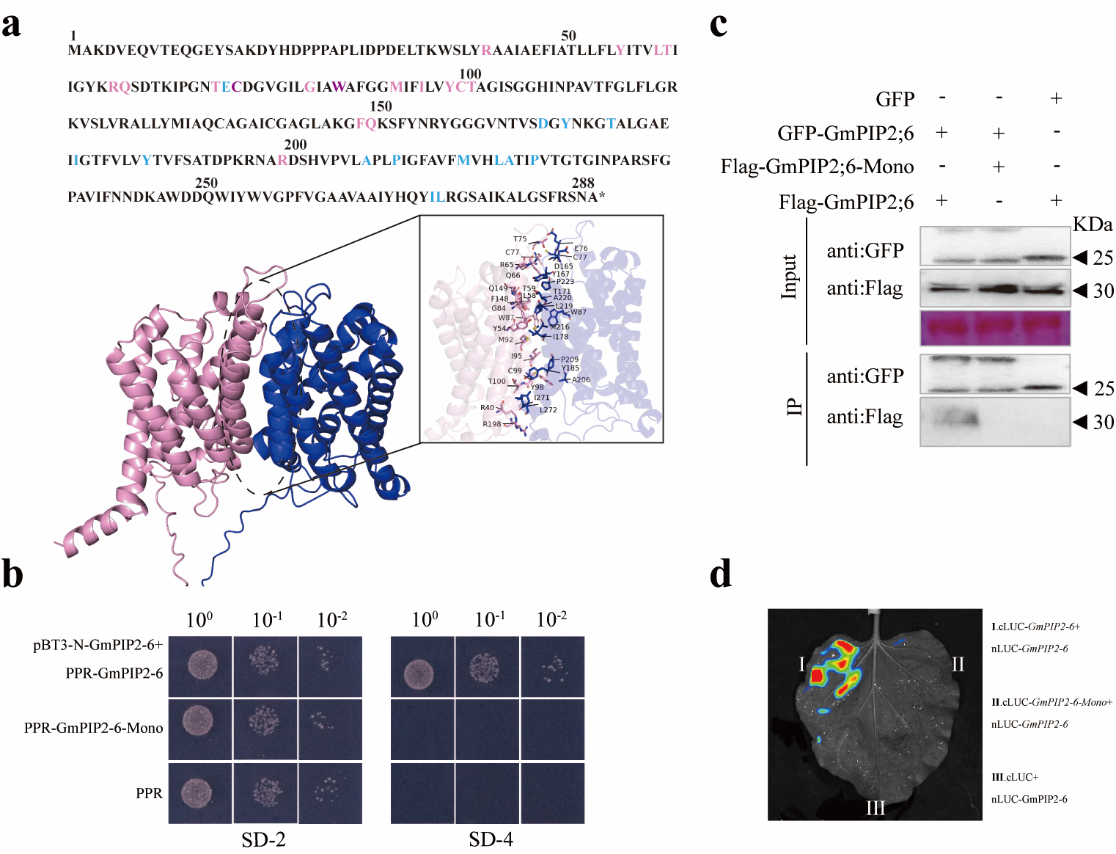


**Supplementary Fig. S8 Identification and functional validation of key residues required for GmPIP2;6 homomeric interaction.** **a.** Structural prediction of GmPIP2;6 homomeric interaction sites using AlphaFold3. Different regions are shown in distinct colors: pink and blue represent two GmPIP2;6 monomers, and purple indicates the predicted interaction interface. **b.** Yeast two-hybrid (Y2H) assay showing that mutation of key residues disrupts the interaction between GmPIP2;6 and the monomeric mutant GmPIP2;6–Mono. **c.** Co-immunoprecipitation (Co-IP) assay confirming that GmPIP2;6–Mono fails to interact with GmPIP2;6 in plant cells. **d.** Split-luciferase complementation assay demonstrating loss of interaction between GmPIP2;6 and GmPIP2;6–Mono.These results collectively verify that the identified residues are essential for GmPIP2;6 tetramer formation.
